# Supplementary material for: RNA-Seq Identified Putative Genes Conferring Photosynthesis and Root Development of Melon under Salt Stress
Source: MDPI journal article supplement (doi:10.3390/genes14091728), 2023-08-29
Supplement: s1 [file s1]

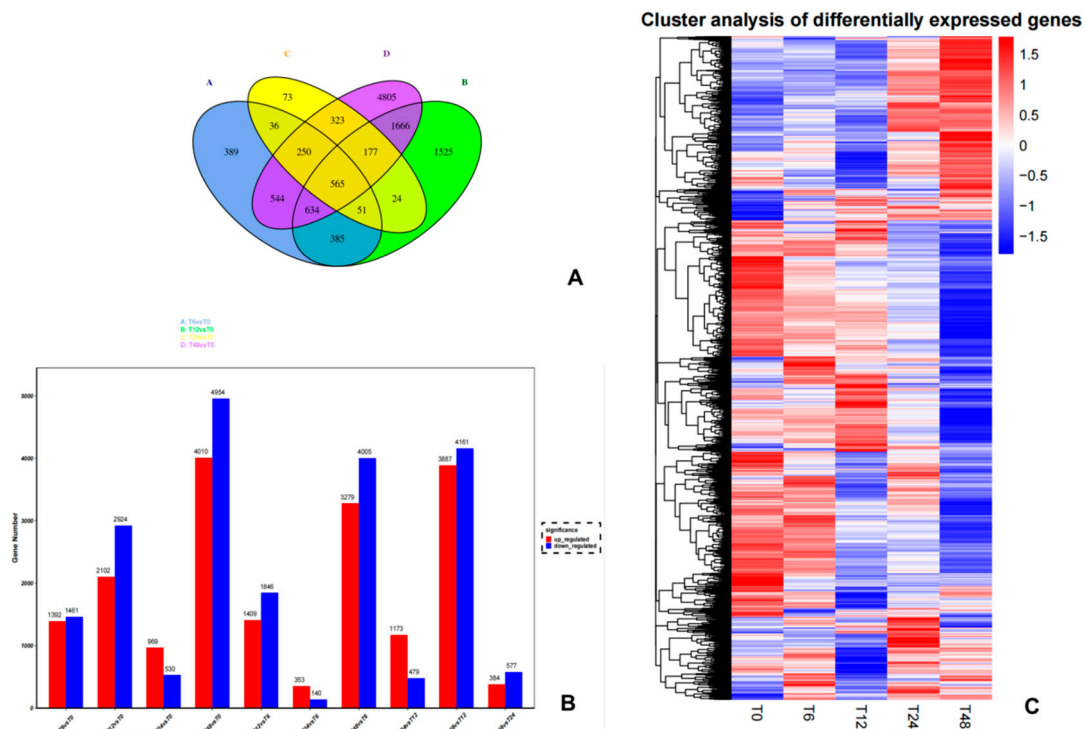

**Figure S1.** Evaluation of gene expression profiles among 15 samples under salt stress. (A) Venn diagram of DEG distributions. (B) DEG quantities in every comparison. (C) Heatmap of correlation coefficients of 5 DEG samples (T0-T48).

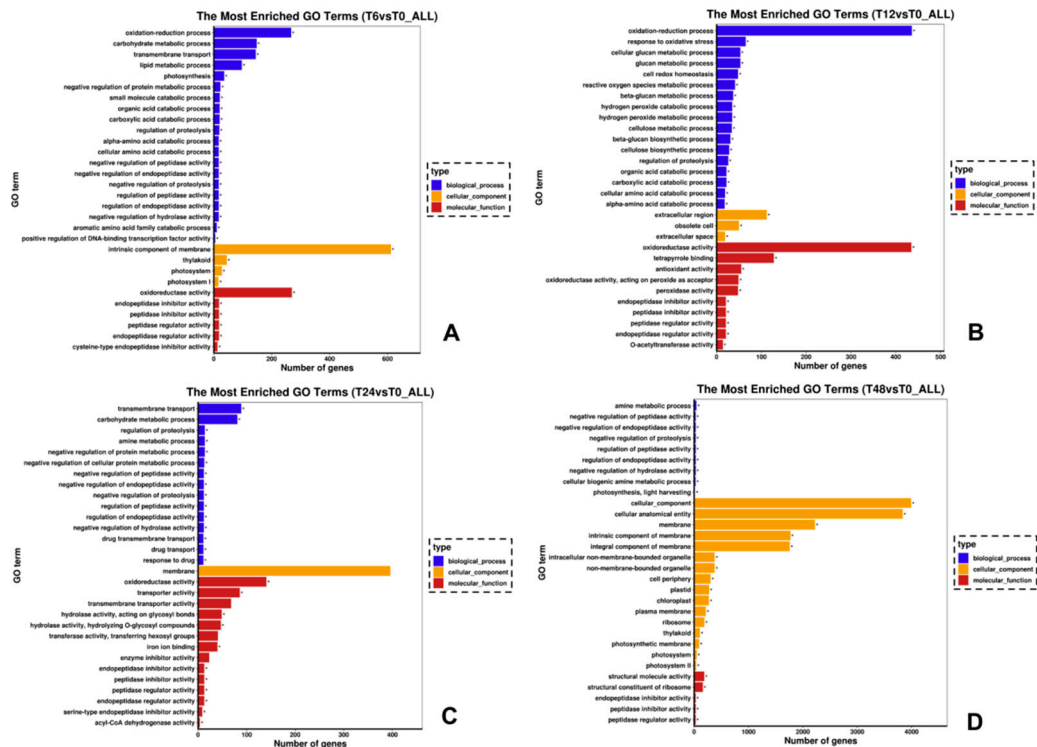

**Figure S2.** Gene ontology categorization of DEGs. DEGs were categorized based on gene ontology (GO) annotation. The proportion of each category is displayed based on the ontology-based biological process, cellular component, and molecular function.

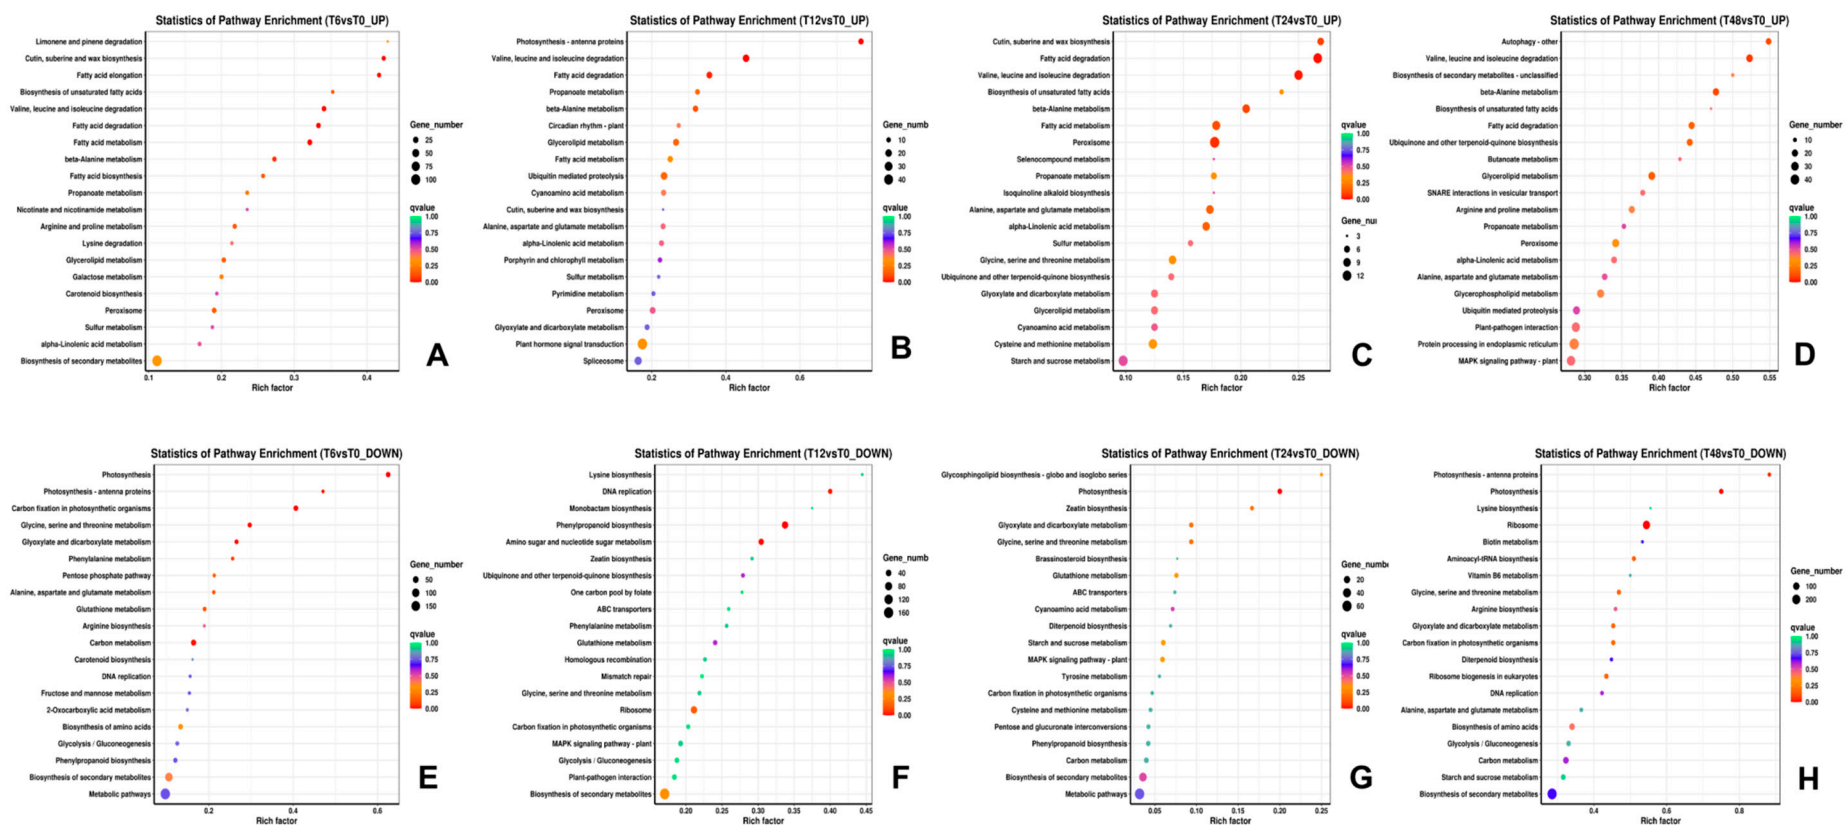

**Figure S3.** Top 20 KEGG pathway enrichment of DEGs that were (A) upregulated following salt stress for 6 h, (B) upregulated following salt stress for 12 h, (C) upregulated following salt stress for 24 h, and (D) upregulated following salt stress for 48 h. (E) downregulated following salt stress for 6 h, (F) downregulated following salt stress for 12 h, (G) downregulated following salt stress for 24 h, and (H) downregulated following salt stress for 48 h.

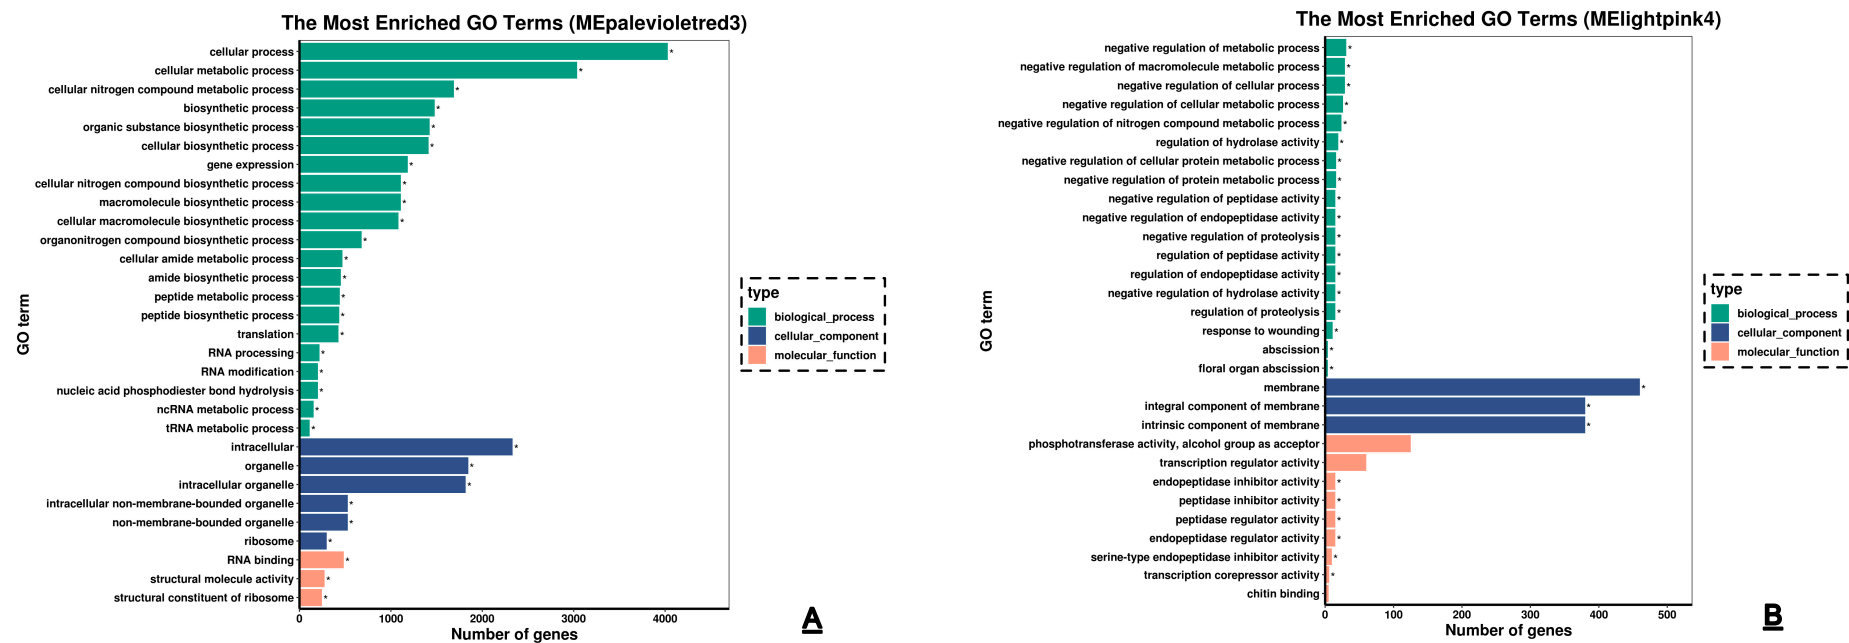

**Figure S4.** Significant GO terms enriched in the DEGs of the two network modules. (A) the top 30 enriched terms in MELightpink3, (B) the top 30 enriched terms in MELightpink4

**Table S1.** DEGs related to key biological processes

| Functional annotation                                   | Gene ID        | FPKM value |        |         |        |        |
|---------------------------------------------------------|----------------|------------|--------|---------|--------|--------|
|                                                         |                | T0         | T6     | T12     | T24    | T48    |
| glycerolipid metabolic process(DGD1)                    | MELO3C009290.2 | 34.19      | 23.24  | 15.74   | 32.98  | 58.16  |
| glycerolipid metabolic process(DGD2)                    | MELO3C003088.2 | 7.99       | 17.92  | 13.01   | 34.29  | 61.62  |
| photosynthesis, light harvesting in photosystem I (LHC) | MELO3C022113.2 | 436.14     | 190.47 | 1083.48 | 175.24 | 62.58  |
| chlorophyll A-B binding protein(LHC)                    | MELO3C003238.2 | 559.47     | 146.71 | 142.22  | 269.58 | 169.65 |
| photosynthesis, light harvesting (LHC)                  | MELO3C015536.2 | 140.70     | 65.58  | 80.16   | 46.34  | 23.44  |
| chlorophyll A-B binding protein(LHC)                    | MELO3C016556.2 | 125.66     | 60.25  | 56.40   | 67.84  | 3.55   |
| photosystem II assembly (PsbP)                          | MELO3C025475.2 | 66.45      | 24.30  | 17.76   | 19.94  | 11.00  |
| photosystem II reaction center W protein(PsbW)          | MELO3C004388.2 | 102.40     | 37.47  | 12.94   | 24.95  | 10.67  |
| Photosystem II stability, chloroplastic(PsbD)           | MELO3C023596.2 | 185.51     | 55.27  | 59.37   | 54.51  | 6.66   |
| photosystem II assembly (PsbP)                          | MELO3C025475.2 | 66.45      | 24.30  | 17.76   | 19.94  | 11.00  |
| plastid thylakoid membrane(PsbS)                        | MELO3C015536.2 | 140.70     | 65.58  | 80.16   | 46.34  | 23.44  |
| Thylakoid lumenal 16.5 kDa protein, chloroplastic       | MELO3C004491.2 | 54.35      | 22.93  | 14.90   | 15.33  | 12.21  |
| NAD(P)-binding Rossmann-fold superfamily protein        | MELO3C024358.2 | 43.11      | 14.69  | 5.71    | 8.15   | 1.01   |
| chlorophyll biosynthetic process (DAR)                  | MELO3C006606.2 | 42.44      | 18.29  | 17.92   | 13.11  | 2.94   |
| Chlorophyllase                                          | MELO3C002961.2 | 1.25       | 1.03   | 0.00    | 0.94   | 0.51   |
| Mg-protoporphyrin IX monomethyl ester cyclase           | MELO3C026802.2 | 77.99      | 34.18  | 54.06   | 51.01  | 36.73  |
| Mg-protoporphyrin IX chelatase(CHLI)                    | MELO3C007233.2 | 178.38     | 77.70  | 53.54   | 60.27  | 18.14  |
| Tetrapyrrole-binding protein, chloroplastic(GUN4)       | MELO3C011657.2 | 71.29      | 22.94  | 31.18   | 18.35  | 5.46   |
| xyloglucan endotransglucosylase/hydrolase               | MELO3C017476.2 | 1.68       | 0.38   | 0.09    | 1.24   | 0.07   |
| xyloglucan endotransglucosylase/hydrolase               | MELO3C017476.2 | 1.24       | 0.17   | 0.24    | 1.03   | 0.10   |
| xyloglucan endotransglucosylase/hydrolase               | MELO3C018033.2 | 1.68       | 0.38   | 0.09    | 1.24   | 0.07   |
| Peroxidase                                              | MELO3C002457.2 | 672.03     | 99.27  | 25.89   | 201.90 | 1.35   |

(next page)

(continued)

|                                             |                |       |       |       |       |        |
|---------------------------------------------|----------------|-------|-------|-------|-------|--------|
| Peroxidase                                  | MELO3C010627.2 | 83.20 | 33.68 | 30.83 | 37.67 | 28.36  |
| Auxin biosynthetic process                  | MELO3C007877.2 | 0.55  | 1.35  | 0.64  | 0.39  | 0.16   |
| Protein LATERAL ROOT PRIMORDIUM 1           | MELO3C015123.2 | 9.51  | 2.19  | 1.90  | 1.93  | 0.67   |
| Indole-3-acetic acid-amido synthetase GH3.3 | MELO3C027346.2 | 3.30  | 20.22 | 2.71  | 90.24 | 112.88 |
| Indole-3-acetic acid-amido synthetase GH3.3 | MELO3C007597.2 | 1.54  | 7.47  | 1.71  | 76.76 | 46.53  |
